# 1 Benchmarking ensemble docking methods as a 2 scientific outreach project

3 Jessie L. Gan<sup>1</sup>, Dhruv Kumar<sup>2</sup>, Cynthia Chen<sup>3,6</sup>, Bryn C. Taylor<sup>4,7</sup>, Benjamin R. Jagger<sup>4,8</sup>, Rommie E. Amaro<sup>4,\*</sup>, and  
4 Christopher T. Lee<sup>5,\*</sup>

5 <sup>1</sup>San Diego Jewish Academy, San Diego, CA 92130

6 <sup>2</sup>Rancho Bernardo High School, San Diego, CA 92128

7 <sup>3</sup>Canyon Crest Academy, San Diego, CA 92130

8 <sup>4</sup>Department of Chemistry and Biochemistry, University of California San Diego, La Jolla, CA 92093

9 <sup>5</sup>Department of Mechanical and Aerospace Engineering, University of California San Diego, La Jolla, CA 92093

10 <sup>6</sup>Current Address: California Institute of Technology, Pasadena, CA 91125

11 <sup>7</sup>Current Address: Discovery Sciences, Janssen Research and Development, San Diego, CA 92121

12 <sup>8</sup>Current Address: Department of Bioengineering and Therapeutic Sciences, University of California San Francisco, San  
13 Francisco, CA 94158

14 \*Correspondence: [ramaro@ucsd.edu](mailto:ramaro@ucsd.edu), [ctlee@ucsd.edu](mailto:ctlee@ucsd.edu)

15 **ABSTRACT** The discovery of new drugs is a time consuming and expensive process. Methods such as virtual screening, which  
16 can filter out ineffective compounds from drug libraries prior to expensive experimental study, have become popular research  
17 topics. As the computational drug discovery community has grown, in order to benchmark the various advances in methodology,  
18 organizations such as the Drug Design Data Resource have begun hosting blinded grand challenges seeking to identify the  
19 best methods for ligand pose-prediction, ligand affinity ranking, and free energy calculations. Such open challenges offer a  
20 unique opportunity for researchers to partner with junior students (e.g., high school and undergraduate) to validate basic yet  
21 fundamental hypotheses considered to be uninteresting to domain experts. Here, we, a group of high school-aged students and  
22 their mentors, present the results of our participation in Grand Challenge 4 where we predicted ligand affinity rankings for the  
23 Cathepsin S protease, an important protein target for autoimmune diseases. To investigate the effect of incorporating receptor  
24 dynamics on ligand affinity rankings, we employed the Relaxed Complex Scheme, a molecular docking method paired with  
25 molecular dynamics-generated receptor conformations. We found that CatS is a difficult target for molecular docking and we  
26 explore some advanced methods such as distance-restrained docking to try to improve the correlation with experiments. This  
27 project has exemplified the capabilities of high school students when supported with a rigorous curriculum, and demonstrates  
28 the value of community-driven competitions for beginners in computational drug discovery.

Keywords: Computational Biophysics; Ensemble Docking; Molecular Dynamics; Drug Discovery; Secondary Education;  
29 Undergraduate Education; Outreach Coordinators

## 30 1 INTRODUCTION

31 Drug discovery efforts often require the screening of many  
32 compounds to determine their efficacy. Owing to the high cost  
33 of experimental screening and advances in computer models,  
34 the use of inexpensive computational screening methods to  
35 enrich compounds in large datasets have been used in drug  
36 discovery pipelines for several decades (1). Early on in the  
37 screening process, when an initial compound library may  
38 contain only a few 'active' among many orders of magnitude  
39 more inactive compounds, computer-aided drug discovery  
40 (CADD) methods, such as virtual screening, can be used to  
41 filter out unlikely candidates, reducing experimental costs,  
42 and accelerating the initial discovery phase (2–4).

43 Due to the diversity and breadth of the CADD research  
44 community, many methods have been developed. Cross-  
45 comparison and benchmarking between the different ap-  
46 proaches is necessary for identifying the limitations of the  
47 docking method and areas for improvement. The Drug Design  
48 Data Resource (D3R) hosts blinded community prediction

49 challenges to evaluate these software and techniques and com-  
50 pare their effectiveness on benchmark systems, such as the  
51 HSP90 chaperone protein, the Farnesoid X nuclear receptor,  
52 and the Cathepsin S protease (CatS) (5–7). In 2018, D3R  
53 hosted Grand Challenge 4 (GC4), which had components of  
54 pose prediction, free energy prediction, and ligand affinity  
55 rank ordering (8).

56 We participated in Subchallenge 2, a ligand affinity ranking  
57 challenge for the Cathepsin S protease with a set of 459 ligands  
58 provided by Janssen Pharmaceuticals (8). CatS is a cysteine  
59 protease involved in the presentation of antigens by the MHC  
60 class II molecules within CD4<sup>+</sup> T cells (9). This makes it a  
61 promising target in autoimmune disease and allergy treatment,  
62 where inhibition of the immune response is critical for effective  
63 therapy (10–12).

64 We used molecular docking, a popular method of vir-  
65 tual screening, in a strategy known as the Relaxed Complex  
66 Scheme to account for protein flexibility (13). Molecular  
67 docking applies a conformational search algorithm paired  
68

69 with an inexpensive, and often empirical, scoring function to  
70 find favorable lead compounds (14, 15). By forgoing rigorous  
71 dynamics and detailed potential energy functions, such as  
72 those used in free energy calculations, docking approaches  
73 are designed to yield results quickly albeit with lower accu-  
74 racy (16). The speed of molecular docking codes enables the  
75 screening of hundreds of thousands to millions of compounds  
76 (17). A risk of docking is the increased likelihood of false  
77 negatives. To this end, much work has been done by the  
78 community to develop improved algorithms which improve  
79 docking accuracy with minimal impact on speed (3).

80 In early docking studies, proteins and ligands were repre-  
81 sented as static structures (16, 18, 19). To incorporate ligand  
82 flexibility, multiple ligand positions can be sampled through  
83 rotational torsions, i.e. conformer generation (20). However,  
84 Molecular Dynamics (MD) simulations have revealed that  
85 thermal protein fluctuations in solute-based environments  
86 can give rise to varying conformational states, resulting in  
87 different binding sites (21). Accounting for receptor binding  
88 site flexibility in molecular docking is a significant challenge.  
89 One solution is to perform ensemble docking. This involves  
90 docking a ligand compound library to a number of distinct,  
91 rigid receptor conformations to identify the receptor confor-  
92 mation that is best suited for that particular ligand (i.e. best  
93 docking score) (20, 22–24).

94 Here, we perform MD simulations of the receptor protein,  
95 CatS, to obtain unique conformational states and introduce  
96 structural variation in the binding site. MD simulations allow  
97 the exploration of multiple conformations of the protein while  
98 in a solute-based, native environment (25, 26). This concept of  
99 selecting naturally-occurring conformations through MD for  
100 ensemble docking is known as the Relaxed Complex Scheme  
101 (26–31). MD-generated ensembles of flexible binding sites  
102 have been used successfully in a number of studies to identify  
103 lead compounds (13, 32–35).

104 Incorporating more receptor conformations increases com-  
105 putational cost, as a complete docking protocol must be per-  
106 formed for each conformation. To address this, the trajectory  
107 can be clustered to extract unique, representative conforma-  
108 tions (36, 37). This methodology is still susceptible to the  
109 conformational sampling problem of MD, due to the large  
110 discrepancy between the accessible timescales of MD simula-  
111 tion (microseconds) and the slow, native dynamics of proteins  
112 (milliseconds and longer) (38, 39). Although a trajectory may  
113 not statistically converge to encompass all possible conforma-  
114 tions, studies have shown that clustering MD trajectories can  
115 reveal previously unknown druggable pockets (32).

116 Many studies have successfully used clustering methods  
117 in ensemble docking to extract relevant conformations, such  
118 as those based on RMSD (26, 34), QR factorization (13, 33),  
119 and active pocket volume (26). However, choosing the most  
120 appropriate clustering method for a system is still challenging  
121 and often dependent on human intuition.

122 Although ensemble docking has been successfully used  
123 to identify lead compounds, clustering methods in ensemble

124 docking have not been extensively studied (40). We explored  
125 three clustering methodologies in this study to investigate  
126 if they could (i) provide an accurate ligand ranking and (ii)  
127 give insights into CatS ligand binding mechanisms. The three  
128 clustering methods we used are: 1) Time-lagged Independent  
129 Components Analysis and K-means clustering (TICA) (41,  
130 42), 2) Principal Component Analysis and K-means clustering  
131 (PCA) (41, 42), and 3) Gromos RMSD clustering (Gromos)  
132 (43). TICA identifies the slowest motions of the simulation  
133 and projects the input features into a slow subspace where  
134 distinct clusters are kinetically separated (44). PCA, on the  
135 other hand, finds features with the largest variance (45). Lastly,  
136 Gromos is a RMSD-based clustering method that counts the  
137 neighbors in a cluster based on a pre-set cutoff value and  
138 defines trajectory clusters by structural variation (43).

139 In this work, we apply the Relaxed Complex Scheme  
140 with these clustering methods and compare the ensemble  
141 docking results (30). We test the accuracy of two state-of-the-  
142 art docking softwares: Open Eye FRED (46) and Schrodinger  
143 Glide (47). We found that CatS is a difficult target for molecular  
144 docking and we explore some advanced methods such as  
145 distance-restrained docking to try to improve the correlation  
146 with experiments.

## 147 2 PEDAGOGICAL SIGNIFICANCE

148 This manuscript presents the work of high school students  
149 who have performed this work after completing BioChem-  
150 CoRe, a 7 week crash course on computational chemistry  
151 (<http://biochemcore.ucsd.edu/>). These results helps to  
152 illustrate the benefits and possibilities of teaching science  
153 as we do science (48, 49). By participating in structured  
154 challenges with real-world significance, students gain motiva-  
155 tion, confidence, and both technical and soft skills. Moreover,  
156 the exposure to the rigors of the scientific approach and the  
157 methods employed in the field of study aids them with their  
158 future career decisions. On the other hand, community-driven  
159 competitions and resources such as D3R's Grand Challenge 4  
160 can also benefit from student participation. Rarely do these  
161 programs receive submission which test the basic hypothesis.  
162 For example, is domain expertise required for the application  
163 of the methods of interest? Given the current state of tutorials  
164 or instructions available to the public, can students with lim-  
165 ited domain experience use these resources to produce results  
166 without major technical difficulties? We posit that student  
167 participation can not only yield important benchmarking data  
168 but also serve to improve the documentation of our tools and  
169 methods.

## 170 3 MATERIALS AND METHODS

171 All scripts used in this work can be found online at <https://github.com/ctlee/bccgc4>. Full workflow of methods  
172 is shown in Fig. 1.  
173

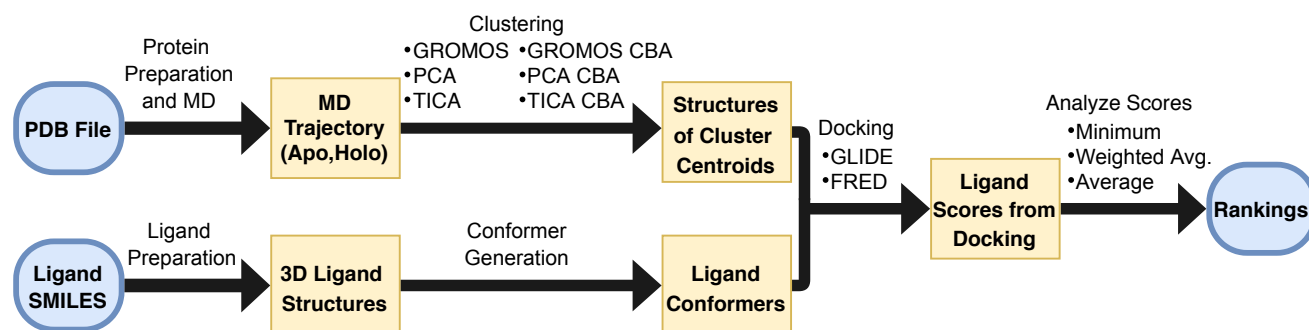

Figure 1: Workflow of ensemble docking approach. PDB file was selected and simulated in Molecular Dynamics. Molecular Dynamics trajectory was clustered by six various methods and cluster centroids were extracted as representative structures. Ligand SMILES were prepared as 3D structures and various conformers were generated. Molecular docking of ligands to cluster centroids was performed with FRED and Glide docking. Pose scores were used to generate rank orderings and Kendall's  $\tau$  values when compared to the experimental rank ordering.

### 174 3.1 Molecular Dynamics

175 A crystal structure of CatS (PDBID: 5QC4 (11)) was obtained  
176 from the RCSB PDB database (50). The structure was chosen  
177 due to its resolution of 2 Å and similarity of the cocrystallized  
178 ligand to those in the D3R dataset. This cocrystal was part of  
179 D3R's prior Grand Challenge 3 (GC3), subchallenge 1, and  
180 the ligands in the CatS subchallenge of Grand Challenge 4 all  
181 contain the tetrahydropyrido-pyrazole core that 22 of the 24  
182 ligands had in the previous challenge (7).

183 Models with (holo) and without (apo) the cocrystallized  
184 ligand were prepared for MD simulations. For both apo  
185 and holo models the same steps were performed with a few  
186 deviations noted below. Chain A of the structure was prepared  
187 in Schrodinger Maestro 2019 (51) with the Protein Preparation  
188 Wizard. For the holo simulation, the cocrystallized ligand was  
189 retained. For the apo simulation the ligand was removed (52).  
190 Force field parameters for the ligand were derived from GAFF  
191 (53) with partial charges fit using the restrained electrostatic  
192 potential method (RESP) (54) from potentials computed  
193 using the AM1-BCC semi-empirical quantum mechanical  
194 method (55, 56). For both systems, the protein termini were  
195 capped with an acetyl (ACE) and N-methyl amide (NME)  
196 capping groups. PROPKA (57, 58) was used to assign residue  
197 protonation states in a solvent of pH 5.0, to mimic experimental  
198 conditions of CatS binding assays (9). Crystal waters with  
199 more than 2 hydrogen bonds to non-waters were retained.

200 Using a combination of pdb4amber and tleap from the  
201 AMBER 18 software suite, we parameterized the systems  
202 with the AMBER FF14SB forcefield, and solvated the systems  
203 with TIP4P-Ew up to a 15 Å buffer distance (59). We added  
204 ions according to the SLTCAP tool by Schmit et al. (60)  
205 at 100 mM salt concentration, again to mimic experimental  
206 conditions (9).

207 All-atom, explicit-solvent MD simulation was performed  
208 for the both systems using AMBER18 in four stages: mini-  
209 mization, heating, equilibration, and production (59). The  
210 systems were gradually minimized in four steps: (i) mini-

211 mization of only protons, restraining the protein and solvent,  
212 (ii) minimization of the solvent, restraining the protein, (iii)  
213 minimization of the protein sidechains, restraining the protein  
214 backbone, and (iv) minimization of all atoms. Restrained heat-  
215 ing was performed in two steps: first, in the NVT ensemble  
216 the temperature was increased from 0 to 100 K over 50 ps  
217 using a Langevin thermostat, and second in the NPT ensemble  
218 the temperature was increased from 100 to 300 K over 200 ps  
219 using a Langevin thermostat while pressure was maintained  
220 at 1 bar using a Berendsen barostat. Equilibration was also  
221 performed in two stages, first with a restrained backbone,  
222 and second without restraints. For both equilibration stages  
223 the temperature was maintained at 300 K using a Langevin  
224 thermostat. For the restrained equilibration stage, 500 ps were  
225 run with a Berendsen barostat to equilibrate pressure to 1 bar.  
226 In the unrestrained equilibration step 1000 ps were run using  
227 a Monte Carlo barostat at 1 bar.

228 Production simulations were run in the NPT ensemble  
229 with the same conditions as the unrestrained equilibration  
230 step. Five independent simulations of each condition, apo and  
231 holo, of length 2  $\mu$ s were run, totaling 20  $\mu$ s. Hydrogen Mass  
232 Repartitioning (HMR) was performed with PARMED (59,  
233 61) for all systems permitting a 4 fs timestep. All simulations  
234 were run with SHAKE restraints (62) and a non-bonded cutoff  
235 of 10 Å.

### 236 3.2 Clustering

237 The MD trajectory was clustered using three different clus-  
238 tering methods: 1) TICA and k-means (41, 42, 63, 64) on  
239 the protein backbone atom position coordinates, 2) PCA and  
240 k-means on the protein backbone atom position coordinates,  
241 and 3) Gromos (43) on the C-alpha atom position coordinates.  
242 To identify a good set of initial input features, we compared  
243 the mean 10-fold cross-validated Variational Approach for  
244 Markov Processes (VAMP2) scores for three selections: i)  
245 protein backbone atom positions, ii) protein backbone tor-

sions, and iii) the positions of a binding atoms selection (65). We decided to use the positions of protein backbone atoms because it had the largest VAMP2 score, indicating greater kinetic variance. The binding atoms were defined by taking all receptor atoms within 2 Å of the initial docked poses of a ligand from the D3R data-set. PCA was clustered on the same subset of backbone atom positions (41), and Gromos was clustered on the C-alpha positions due to memory limitations. After the challenge, the clustering was reevaluated and a second discretization using the binding atoms selection, referred to as Clustered by Binding Atoms (CBA), was generated. We used similar ideas as the approach taken in Ref. (66), focusing on the binding site's structural fluctuations rather than the entire structure. All six clustering methods (TICA, PCA, and Gromos for backbone or C-alpha atoms and CBA) were also performed on the holo MD trajectories. The cluster centroids of the apo MD were compared by pairwise RMSD, utilizing MDTraj and NumPy together to calculate RMSDs and order them into a matrix which was visualized in matplotlib (67–69). They were also compared in terms of Root-Mean-Squared-Fluctuation (RMSF) to investigate the particular structural variability, computed in MDTraj and visualized in PyMOL (68, 70).

### 3.2.1 Time-lagged Independent Components Analysis and K-means (TICA)

TICA clustering was employed to capture the slow motions within the trajectory. TICA was performed with a lag time of 4 ps and a variance cutoff of 0.95 on the protein backbone atom coordinates (41). The trajectory was projected into the TIC basis and subsequently, the k-means algorithm was used to cluster the trajectory into 10 distinct clusters. The 10 configurations from the trajectory, in real space, closest in TIC space to the cluster centroids were used for docking (42).

### 3.2.2 Principal Components Analysis and K-means (PCA)

PCA with a variance cutoff of 0.95 was performed on the protein backbone atom coordinates to capture large motions within the trajectory (41). The trajectory was projected into the PC basis and subsequently, the k-means algorithm was used to cluster the trajectory into 10 clusters. The 10 configurations from the trajectory, in real space, closest in PC space to the cluster centroids were used for docking (42).

### 3.2.3 Gromacs RMSD-Based Clustering (Gromos)

Gromos clustering was performed on the alpha carbons in the protein to identify structurally diverse conformations according to RMSD (43). The trajectories input to Gromos were subsampled to yield frames every 0.4 ps. This was due to computational intractability at more frequent frame rates. The clustering RMSD cutoff was chosen to satisfy the following criteria: (i) the first cluster had less than 70% of the frames,

(ii) the first 10 clusters contained at least 80% of the frames, and (iii) each of the first 10 clusters had at least 20 frames. A cutoff of 0.08 Å was used when clustering with alpha carbons while a cutoff of 0.15 Å was used when compared to CBA for the apo trajectory. A cutoff of 0.07 Å was used when clustering with alpha carbons while a cutoff of 0.135 Å was used when compared to CBA for the holo trajectory.

## 3.3 Docking

OpenEye Scientifics Fast Exhaustive Docking (FRED) was used to dock the 459 ligands in the GC4 CatS challenge to the centroids of the clustered MD trajectory and the original crystal structure (46). After the challenge, Schrodinger's Glide was also used in an attempt to improve rank ordering and pose prediction (47, 71). In addition, many iterations of Glide docking were run with modifications to further improve the results. The pose results were visualized in Schrodinger's Maestro (51) and labeled in Inkscape (72). The pose results were analyzed for accuracy through the RMSD of the common core to the original cocrystal ligand core, calculated using Schrodinger's Python API and visualized in matplotlib (69).

### 3.3.1 FRED

OpenEye's OMEGA was used to convert ligand SMILES to 3D conformers, with the maximum number of conformers per ligand set to 800 (73). The conformers were then docked to the crystal structure and the 10 cluster centroids from each clustering method using OEDockings FRED default settings (Chemgauss4 scoring function with standard search resolution) (46, 74). The receptor area was defined by a box around the protein, determined by the minimum and maximum distance coordinates of the entire protein. For each receptor ensemble, the minimum score of every ligand was used in determining the rank ordering, as in previous studies (13, 32).

### 3.3.2 Glide

Schrodinger's Ligprep was used to convert ligand SMILES using standard settings into Maestro structures for Schrodinger's Glide docking (75). Glides cross-docking script, xglide.py, was used to perform ensemble docking for each clustering method. The cross-docking script generated receptor grid files for each centroid structure using a 32 Å box centered on the center of mass of the crystal structure's ligand (BC7 (11)) to define the docking region. Each centroid was then docked to using Glides Standard Precision (SP) docking methodology, which has its own ligand conformer generation steps, and scored with the subsequent Standard Precision GlideScore scoring function (47, 71). For each ensemble docking approach, the best score of each ligand across the ensemble of conformations ( $\mathbf{N}$ ) was used to determine its rank,

$$s_l = \min\{s_{l,i} : i \in \mathbf{N}\}, \quad (1)$$

343 where  $s_l$  and  $s_{l,i}$  are the best overall score and best score for  
344 receptor conformation  $i$  for ligand  $l$  respectively.

345 To further investigate the ligand binding we also 1) applied  
346 a restraint on the tetrahydropyrido-pyrazole common core  
347 structure, restricted to lie within 3.5 Å of the cocrystal ligand's  
348 common core, 2) changed the precision of the docking and  
349 scoring function from Glide SP to Glide Extra Precision (XP)  
350 (76), and 3) clustering and docking to centroids from a holo  
351 MD trajectory.

### 352 3.4 Scoring Schemes for Ligand Scores

353 Aside from changing the docking methodology, we also tried  
354 two other scoring schemes such as taking the average and the  
355 weighted average (Eq. (2)) of the OpenEye's FRED and Glide  
356 SP scores.

$$s_l = \sum_{i \in \mathbf{N}} P_i * s_{l,i}. \quad (2)$$

357 where  $P_i$  is the probability of observing conformation  $i$ ,  $s_{l,i}$  is  
358 the best docked score for that conformation, and  $\mathbf{N}$  is the set  
359 of conformations in the ensemble. Note that the probabilities,  
360  $P_i$ , are normalized such that  $\sum_{i \in \mathbf{N}} P_i = 1$ . The  $P_i$  for a given  
361 conformation  $i$  is calculated as  $f_i/f_T$ , where  $f_i$  is the number  
362 of frames in the same cluster as  $i$ , and  $f_T$  is the total number  
363 of frames in the trajectory. These scoring schemes have been  
364 used in other studies due to the reasoning that the average (33,  
365 77) or weighted average (34, 35) score better accounts for the  
366 variability of the ensemble, and in the case of the weighted  
367 average, represents the likelihood of the ligand encountering  
368 each representative conformation in a natural environment.

### 369 3.5 Kendall's Taus

370 Ligand rankings were created by sorting the ligands based on  
371 their score. Kendall's Tau values were calculated by comparing  
372 the predicted rank ordering to the experimental rank ordering  
373 using the Kendall's Tau function in SciPy (78).

## 374 4 RESULTS AND DISCUSSION

375 In lieu of running expensive free energy calculations which  
376 account for both ligand and receptor flexibility, the Relaxed  
377 Complex Scheme attempts to reduce computational cost while  
378 capturing the flexibility of a protein by docking to multiple  
379 protein conformations selected from a MD simulation. These  
380 representative conformations are often chosen by combining  
381 a method of dimensionality reduction followed by the appli-  
382 cation of a clustering algorithm. Although this approach is  
383 conceptually simple, the choice of clusters has many pitfalls.  
384 For example, even if a set of clusters spans the conforma-  
385 tional diversity of the MD trajectory, the ensemble will not  
386 necessarily produce the most accurate ligand rank ordering  
387 (40). Some receptors may have natural conformations which  
388 are not ideal for ligand binding, and these may result in false  
389 positives (25). In addition, the active conformation for ligand

390 binding could be transient, and would have a lower probability  
391 of being represented in the ensemble.

392 To test the effect of clustering approach on the resulting  
393 conformations, we test several different clustering methods.  
394 TICA captures slow protein movements (variance in time),  
395 while PCA focuses on large structural variance, and Gromos  
396 captures structural variations as measured by RMSD. We  
397 plot the structural variation across clusters from the different  
398 algorithms in Fig. 2B,C, where CBA refers to clustered by  
399 binding atoms, defined in Fig. 2A. We find that centroids  
400 from different clustering methods vary in different structural  
401 domains, Fig. 2C. The structural fluctuation around the binding  
402 site (facing the reader in Fig. 2C) are most likely to affect  
403 ligand binding. By restricting the set features input to the  
404 clustering workflow to the binding atoms, we find that the  
405 CBA methods capture increased variability in the binding  
406 site.

### 407 4.1 Initial Docking

408 Our FRED docking results performed worse than random rank  
409 ordering (Fig. 3A). To investigate the influence of docking  
410 algorithm, both scoring and conformational searching, we  
411 also performed docking with Schrodinger's Glide (81). The  
412 rank order correlation of the predictions from Glide docking  
413 were better than random rank ordering (Fig. 3B).

414 There are some inherent differences between OpenEye's  
415 FRED and Schrodinger's Glide conformational search algo-  
416 rithms. FRED's docking algorithm emphasizes shape com-  
417 plementarity between the ligand and protein through an ex-  
418 haustive pose search that samples multiple ligand positions. It  
419 accounts for ligand rotations and scores multiple poses before  
420 selecting one top scoring pose per ligand (46). On the other  
421 hand, Glide's docking algorithm begins with receptor grid  
422 generation and focuses on ligand binding energy, including  
423 a ligand minimization with a standard molecular mechanics  
424 energy function, the OPLS-AA force field, and a distance-  
425 dependent dielectric model. In addition, the final poses are  
426 refined with a Monte-Carlo procedure to find torsional min-  
427 ima (47). Both methods consider ligand conformers, either  
428 generated separately (through OpenEye OMEGA) or as part  
429 of the docking workflow (Glide).

430 The scoring functions also differ between the two software.  
431 For FRED, the ChemGauss 4 scoring function, which uses  
432 Gaussian-smoothed step-function based interaction potentials,  
433 is used to optimize top poses from the filtering steps (46).  
434 Meanwhile, Glide's GlideScore uses more complex and varied  
435 weight functions for the various potential terms (47). The  
436 more complex approach to fit empirical scoring functions used  
437 by Glide may have improved the pose prediction similarity to  
438 cocrystal poses and the rank ordering accuracy.

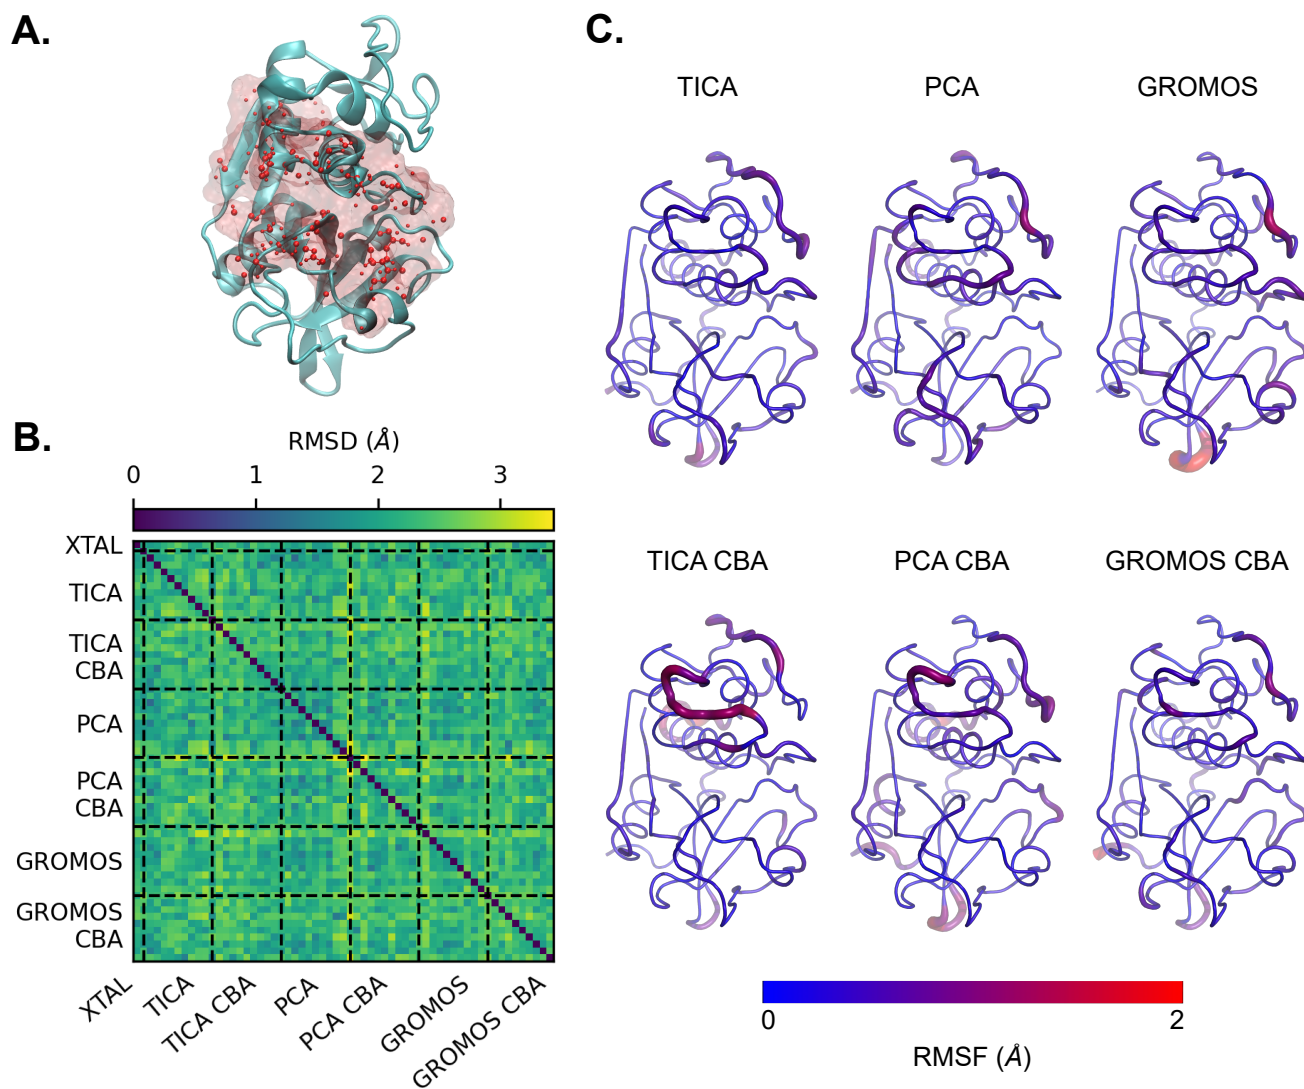

Figure 2: Apo Molecular Dynamics (MD) Clustering Results. A) Binding Atoms definition for Clustered by Binding Atoms (CBA) centroids, defined by taking all atoms within 2 Å of docked poses of a ligand from the D3R dataset (CatS\_2) from both Glide and FRED SP apo blind docking. The crystal structure protein is depicted in NewCartoon and colored teal, while the binding atoms are both represented by red spheres and a transparent red surface representation, visualized in Visual Molecular Dynamics (VMD) (79, 80). B) The pairwise Root-Means-Squared-Deviations (RMSDs) of the binding atoms of the crystal structure and all 10 centroid structures from each clustering method are depicted in a heatmap. The centroids obtained from clustering have a range of RMSDs and therefore have structural variability. C) MD clustering extracts various centroid structures, and different clustering methods yield different conformations. The RMSF of the 10 centroids extracted from each clustering method, shown as the relative thickness and color, was calculated with MDTraj (68) and visualized using PyMOL (70). The orientation of the protein for parts A and C are the same.

|                  |                | Kendall's $\tau$ For All Ligand Rankings |       |       |        |          |         |            |  |
|------------------|----------------|------------------------------------------|-------|-------|--------|----------|---------|------------|--|
| Docking Function | Scoring Method | Clustering Methods                       |       |       |        |          |         |            |  |
|                  |                | XTAL                                     | TICA  | PCA   | GROMOS | TICA CBA | PCA CBA | GROMOS CBA |  |
| FRED AB          | Minimum        | -0.08                                    | 0.04  | -0.18 | -0.06  | -0.06    | -0.05   | -0.08      |  |
|                  | W. Avg.        | -                                        | -0.11 | -0.20 | -0.04  | -0.11    | -0.09   | -0.06      |  |
|                  | Avg.           | -                                        | -0.13 | -0.09 | -0.10  | -0.09    | -0.21   | -0.10      |  |
| Glide SP-AB      | Minimum        | 0.20                                     | 0.18  | 0.18  | 0.22   | 0.12     | 0.28    | 0.12       |  |
|                  | W. Avg.        | -                                        | 0.21  | 0.20  | 0.18   | 0.17     | 0.24    | 0.21       |  |
|                  | Avg.           | -                                        | 0.20  | 0.21  | 0.25   | 0.20     | 0.24    | 0.23       |  |
| Glide SP-AR      | Minimum        | 0.13                                     | 0.14  | 0.13  | 0.13   | 0.11     | 0.11    | 0.09       |  |
|                  | W. Avg.        | -                                        | 0.08  | 0.07  | 0.10   | 0.09     | 0.05    | 0.07       |  |
|                  | Avg.           | -                                        | 0.12  | 0.07  | 0.09   | 0.07     | 0.06    | 0.09       |  |
| Glide XP-AB      | Minimum        | 0.20                                     | 0.11  | 0.11  | 0.12   | 0.11     | 0.24    | 0.14       |  |
|                  | W. Avg.        | -                                        | 0.10  | 0.08  | 0.08   | 0.11     | 0.17    | 0.15       |  |
|                  | Avg.           | -                                        | 0.11  | 0.08  | 0.07   | 0.12     | 0.19    | 0.17       |  |
| Glide XP-AR      | Minimum        | 0.13                                     | 0.14  | 0.10  | 0.12   | 0.11     | 0.09    | 0.13       |  |
|                  | W. Avg.        | -                                        | 0.10  | 0.07  | 0.04   | 0.07     | 0.03    | 0.11       |  |
|                  | Avg.           | -                                        | 0.11  | 0.07  | 0.06   | 0.04     | 0.04    | 0.08       |  |
| Glide SP-HB      | Minimum        | 0.09                                     | 0.17  | 0.14  | 0.18   | 0.23     | 0.23    | 0.18       |  |
|                  | W. Avg.        | -                                        | 0.20  | -0.01 | 0.17   | 0.24     | 0.14    | 0.20       |  |
|                  | Avg.           | -                                        | 0.22  | -0.01 | 0.21   | 0.23     | 0.18    | 0.21       |  |
| Glide SP-HR      | Minimum        | 0.12                                     | 0.18  | 0.13  | 0.11   | 0.16     | 0.17    | 0.15       |  |
|                  | W. Avg.        | -                                        | 0.13  | 0.09  | 0.08   | 0.15     | 0.11    | 0.13       |  |
|                  | Avg.           | -                                        | 0.15  | 0.11  | 0.12   | 0.14     | 0.13    | 0.14       |  |

Table 1: The Kendall's  $\tau$ s for the FRED and initial Glide docking show slight fluctuations in different scoring schemes, but do not show any immense improvement. Here we show the Kendall's  $\tau$  from rank orderings produced through various docking functions, clustering methods, and scoring schemes. Docking Functions are labeled accordingly: SP: Glide Standard Precision Docking, XP: Glide Extra Precision Docking; A: apo structure, H: holo structure; B: blind docking, R: restrained docking. We experimented with these scoring schemes to test if a particular method of discerning scores for each ensemble would better represent the protein binding mechanisms and improve rank ordering. The various scoring schemes were the Minimum, Weighted Average (W. Avg.), and Average (Avg.).

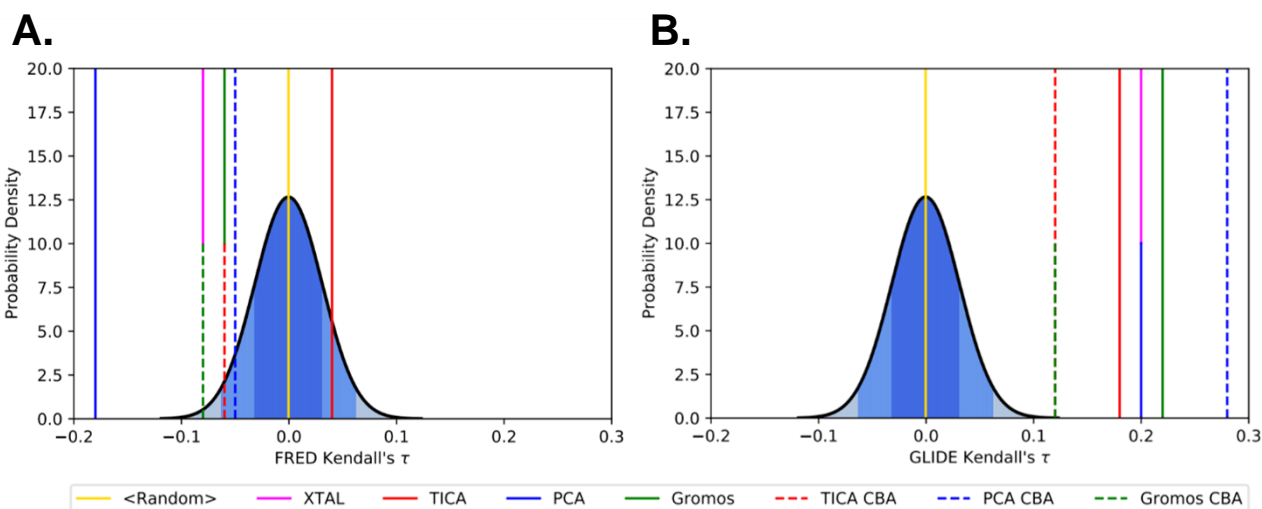

Figure 3: The FRED rank ordering results were unsuccessful in producing a higher Kendall's  $\tau$  value than random ordering, while the Glide results were able to predict better than random. A) Kendall's  $\tau$  values for ligand rankings based on minimum scores from OpenEye's FRED blind docking to apo MD centroids, compared to a random rank ordering distribution. B) Kendall's  $\tau$  values for ligand rankings based on minimum scores from Schrodinger's Glide docking to apo MD centroids, compared to a random rank ordering distribution. In both A) and B) a probability distribution function is graphed from the Kendall's  $\tau$  values of 10,000 random ligand rank orderings. The distribution has  $\mu = 0$  and  $\sigma = 0.031$ .

## 4.2 Scoring Scheme Results

Next, we investigated if the approach to compute a single score from an ensemble of scores can improve the accuracy of our predictions. There are several ways to obtain a single score from an ensemble of values. The first is to take the minimum score of the ensemble. This assumes that the other configurations do not contribute to the ligand binding energy. Relaxing this assumption, it is possible to consider the contributions of other receptor configurations by using an average or weighted average of the ensemble values. The choice of weights may be assigned by the probability of observing each conformation among other strategies. Limitations from the limited sampling of MD may lead to unintended biases in the ensemble weights.

In our results, we saw minor fluctuations in Kendall's  $\tau$ s across different scoring schemes (Table 1). While some conditions saw improvements to Kendall's  $\tau$  when using the weighted average versus the minimum score, no consistent rationale for these improvements were found. It is therefore unclear from this system and study whether or not incorporating receptor flexibility can improve predictions of rank ordered correlation. We hypothesize that the challenges of docking to CatS which has a large solvent-exposed binding pocket may outweigh the benefits of incorporating receptor flexibility which has been reported in other works (26, 30).

To further understand the shortcomings in our approach, we conducted multiple revisions to both the trajectory clustering and the docking methodology.

## 4.3 Pose Analysis and Glide Docking Revisions

We found that the ligands in the CatS dataset had a common tetrahydropyrido-pyrazole core to other ligands with published cocrystal structures from a prior D3R Grand Challenge (GC3) (Fig. S1) (7, 50). The poses from FRED docking were varied and often located opposite from the binding location of similar cocrystallized ligands (Fig. 4A). Other cocrystals contain ligands bound to this alternative site, although these ligands are dissimilar to the ones in our dataset (ligands 29 to 48 in Fig. S1, Table. S1) (82).

Glide docking produced some poses similar to the cocrystal pose (Fig. 4B) although it also produced more unexpected poses. We also observed cocrystals with ligands binding in the less common "flipped core" configuration, shown in Fig. 4C, reported in GC3 (7).

To test the hypothesis whether improved pose similarity to cocrystal structures can improve docking accuracy, we applied a distance-restraint to the common core of the ligands using the core position of published cocrystals with similar ligands as a reference point (Fig. 4D). Other work has found that approaches which use information from cocrystals such as template docking or restraints can improve pose accuracy (5-7, 83, 84). The restraint employed eliminated poses which deviate significantly from the cocrystal pose while permitting the flipped configuration. As shown in Fig. 4E, the RMSDs of the tetrahydropyrido-pyrazole core in SP apo docking were reduced (from a median of 7.39 Å to 1.40 Å) by adding the restraint, however, this did not improve the accuracy of the



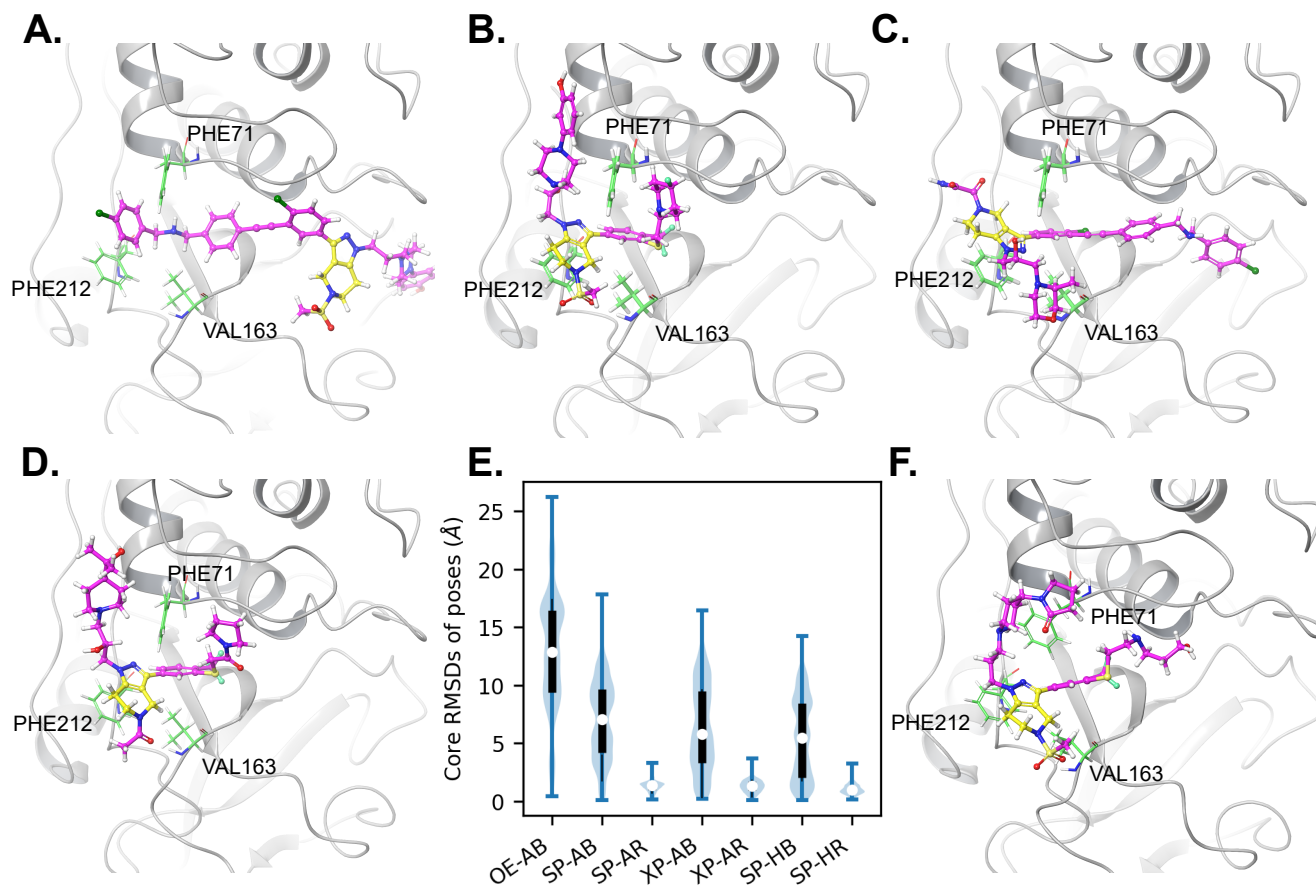

Figure 4: Docking pose analysis shows that a distance-restraint improves pose accuracy. A) Ligand CatS 259, example of an inaccurate FRED pose, with the core in a different location than the crystal structure of a similar ligand. B) Ligand CatS 118 of the SP apo blind crystal docking: ideal pose most similar to the cocrystal structure. C) Ligand CatS 363 of the SP apo blind crystal docking: some docked ligands show a flipped core binding mode that is less common but can be found in some available cocrystals. (7). D) cocrystal pose (PDBID: 5QC4 (11)) Ligand carbons are pink; ligand common core carbons are yellow; key binding residues PHE71, VAL163, and PHE212 are green. E) The RMSDs of the ligand core for each pose in each Glide docking method show that blind poses were concentrated farther from the cocrystal position compared to the ligand-core-restrained docking. In addition, the FRED average core RMSD is larger than that of all blinded Glide RMSDs. Each violin is composed of all minimum poses for each clustering method which contributed to the final rank ordering and the crystal structure poses, totaling  $n = 3213$  per violin. Method Acronyms: OE: OpenEye FRED docking, SP: Glide Standard Precision Docking, XP: Glide Extra Precision Docking; A: apo structure, H: holo structure; B: blind docking, R: restrained docking. The median is represented in white, the interquartile range is shown in black, and the minimum and maximum values are shown as whiskers. F) Ligand CatS 23 of the SP apo restrained PCA docking: When the ligand is restrained, it can be unnaturally docked in receptors that are dissimilar to the cocrystal, such as here where the PHE71 is in a different configuration.

496 ranking (Table 1).

497 The ligand core restraint may not be appropriate for all  
498 centroids (e.g., Fig. 4F). The reference for the restraint is  
499 defined for all receptor configurations by RMSD alignment to  
500 the cocrystal structure. Receptor configurations which exhibit  
501 large structural differences from the cocrystal structure may  
502 have poor binding site alignment which introduces uncertainty  
503 into the approach. For some receptor configurations, restraints  
504 lead to atypical binding poses with high solvent accessibility.

505 To test whether using a more complex scoring function and  
506 search algorithm at the cost of computational efficiency can  
507 improve the predicted rank ordering, we compared between  
508 GlideScore SP and GlideScore Extra Precision (XP), with  
509 and without the restraint, using the same ensembles from apo  
510 MD. Compared to Glide SP, Glide XP (i) has more exhaustive  
511 docking by performing Glide SP docking then performing a  
512 separate anchor-and-grow sampling procedure, and (ii) the  
513 Glide XP scoring function penalizes ligand poses more harshly  
514 with desolvation penalties, identification of enhanced binding  
515 motifs, and higher receptor-ligand shape complementarity  
516 (76). Glide XP has been found to outperform other methods  
517 and achieve better drug discovery results than Glide SP (81).  
518 We found that Glide XP did not improve our predictions (1).  
519 Although the poses predicted by XP were more similar to the  
520 cocrystallized poses (4E).

521 To test whether conformational selection may lead to  
522 improved results, we docked to centroids picked from a holo  
523 MD simulation. McGovern and Shoichet have showed that use  
524 of a holo structure can improve enrichment of lead compound  
525 identification (85). We also expected that structures with a  
526 ligand would lead to lower ligand core RMSD's with more  
527 accurate active residue positioning. However, the Kendall's  
528  $\tau$ s of the rank ordering stayed within the same range as the  
529 original apo docking, even when the ligand was restrained  
530 (1). Upon further analysis of the structural fluctuations of the  
531 apo and holo MD centroids, we find that residue PHE71 is  
532 restricted by the ligand while other regions of the binding  
533 pocket exhibited similar structural variability (Fig. S2). When  
534 ligands were blindly docked using Glide SP to the holo  
535 structures, the resulting poses remained different than the  
536 cocrystal pose. The average RMSD of the docked ligand cores  
537 was 5.47 Å from the core of the cocrystal ligand (4C). Overall,  
538 the blind docking to structure from the holo MD trajectory had  
539 a slightly lower ligand core RMSD compared to the results  
540 from docking to the apo MD (Fig. S3). When a core restraint  
541 was applied upon docking to configurations from the holo  
542 trajectory, even with the influence of the bound ligand on the  
543 binding site, the rank ordering did not improve (1).

544 Although others have suggested that improved poses could  
545 yield better scores (86), we found that improvements to the  
546 predicted poses from the application of ligand restraints and/or  
547 docking to holo receptor conformations did not improve our  
548 predictions. This suggests that there may be other confounding  
549 factors influencing our results.

## 550 5 CONCLUSION

551 In this work we describe our submission to subchallenge 2  
552 of the Drug Design Data Resource (D3R) Grand Challenge  
553 4 where we performed ensemble docking to rank order lig-  
554 ands by binding affinity. We explore and compare several  
555 factors including the choice of clustering algorithm for choos-  
556 ing representative receptor conformations and two docking  
557 workflows with and without restraints to improve pose accu-  
558 racy. The different clustering algorithms produce different  
559 structural ensembles which can influence the docking results.  
560 Owing to the difficulty of docking to the CatS system, which  
561 has been recognized by others (87), we find that more so-  
562 phisticated approaches can improve rank ordering compared  
563 to naive settings produced by FRED and GLIDE using a  
564 basic ensemble docking workflow (7). Glide yielded better  
565 rank order correlations than FRED although no notable dif-  
566 ferences between the clustering algorithms was observed. We  
567 conclude that confounding factors and complications of the  
568 CatS system outweigh the benefits of ensemble docking. We  
569 explored if rank-order correlation could be improved with  
570 better pose accuracy by performing docking with restraints  
571 in addition to docking with receptor conformations extracted  
572 from a holo trajectory with ligand removed. We find that both  
573 approaches improve the pose similarity of docked ligands to  
574 related cocrystallized ligands, but do not improve the rank  
575 order correlation.

576 This project illustrates the benefits of partnering with high  
577 school and undergraduate students to participate in commu-  
578 nity challenges. Grand challenges are excellent resources for  
579 teaching research skills through a semi-guided, goal-oriented  
580 project, with expert curated datasets and deadlines. The stu-  
581 dents were exposed to important research skills, such as  
582 managing time, selecting and performing data analyses, and  
583 making publication-quality figures, at early stages of their  
584 scientific career. Owing to the computational nature of this  
585 challenge, the students also gained experience with data man-  
586 agement, computational thinking, and script development. We  
587 suggest that student participation in community challenges  
588 can benefit both the community and the students and hope  
589 this work encourages others to explore this approach.

## 590 AUTHOR CONTRIBUTIONS

591 Conceptualization, B.C.T., B.R.J., C.T.L. and R.E.A.; Soft-  
592 ware, J.L.G., D.K., and C.C.; Investigation, J.L.G., D.K., and  
593 C.C.; Resources, B.C.T., B.R.J., C.T.L. and R.E.A.; Writ-  
594 ing – Original Draft, J.L.G. and D.K.; Writing – Review  
595 and Editing, J.L.G., D.K., C.C., B.C.T., B.R.J., C.T.L. and  
596 R.E.A.; Visualization, J.L.G., D.K.; Supervision and Project  
597 Administration, B.C.T., B.R.J., C.T.L. and R.E.A.; Funding  
598 Acquisition, R.E.A.

## ACKNOWLEDGMENTS

This work is supported by the National Biomedical Computation Resource NIH Grant P41-GM103426, and the National Science Foundation through The Extreme Science and Engineering Discovery Environment (XSEDE) supercomputing resources provided via Award TG-CHE060073 to R.E.A. C.T.L. is funded by a Hartwell Foundation Postdoctoral Fellowship. We thank D3R and the organizers of Grand Challenge 4 for hosting the challenge and reporting results. We would also like to acknowledge Mason V. Holst, Gaurie Gunasekaran, Gray Thoron, and Jeffery R. Wagner for their contributions to preliminary work and/or helpful discussions.

## SUPPLEMENTARY MATERIAL

The structural similarity of the dataset ligands to cocrystallized ligands, RMSF across receptor structures for the apo and holo trajectories, and comparison of ligand core RMSD across clustering methods are available in the supplemental information.

## REFERENCES

1. Barbara M. Bolten and Tracy DeGregorio. “Trends in development cycles”. In: *Nature Reviews Drug Discovery* 1.5 (2002), pp. 335–336. ISSN: 1474-1784. DOI: [10.1038/nrd805](https://doi.org/10.1038/nrd805). URL: <https://www.nature.com/articles/nrd805>.
2. Steven M. Paul et al. “How to improve R&D productivity: the pharmaceutical industry’s grand challenge”. In: *Nature Reviews Drug Discovery* 9.3 (2010), pp. 203–214. ISSN: 1474-1784. DOI: [10.1038/nrd3078](https://doi.org/10.1038/nrd3078). URL: <https://www.nature.com/articles/nrd3078>.
3. A. Lavecchia and C. Giovanni. “Virtual Screening Strategies in Drug Discovery: A Critical Review”. In: *CMC* 20.23 (2013), pp. 2839–2860. ISSN: 09298673. DOI: [10.2174/09298673113209990001](https://doi.org/10.2174/09298673113209990001). URL: <http://www.eurekaselect.com/openurl/content.php?genre=article&issn=0929-8673&volume=20&issue=23&page=2839>.
4. Evanthia Lionta et al. “Structure-based virtual screening for drug discovery: principles, applications and recent advances”. In: *Current Topics in Medicinal Chemistry* 14.16 (2014), pp. 1923–1938. ISSN: 1873-4294. DOI: [10.2174/1568026614666140929124445](https://doi.org/10.2174/1568026614666140929124445).
5. Symon Gathiaka et al. “D3R grand challenge 2015: Evaluation of proteinligand pose and affinity predictions”. In: *Journal of Computer-Aided Molecular Design* 30.9 (2016), pp. 651–668. ISSN: 0920-654X, 1573-4951. DOI: [10.1007/s10822-016-9946-8](https://doi.org/10.1007/s10822-016-9946-8). URL: <http://link.springer.com/10.1007/s10822-016-9946-8>.
6. Zied Gaieb et al. “D3R Grand Challenge 2: blind prediction of protein-ligand poses, affinity rankings, and relative binding free energies”. In: *Journal of Computer-Aided Molecular Design* 32.1 (2018), pp. 1–20. ISSN: 1573-4951. DOI: [10.1007/s10822-017-0088-4](https://doi.org/10.1007/s10822-017-0088-4).
7. Zied Gaieb et al. “D3R Grand Challenge 3: blind prediction of proteinligand poses and affinity rankings”. In: *Journal of Computer-Aided Molecular Design* 33.1 (2019), pp. 1–18. ISSN: 0920-654X, 1573-4951. DOI: [10.1007/s10822-018-0180-4](https://doi.org/10.1007/s10822-018-0180-4). URL: <http://link.springer.com/10.1007/s10822-018-0180-4>.
8. *D3R|Grand Challenge 4*. URL: <https://drugdesigndata.org/about/grand-challenge-4>.
9. Robin L. Thurmond et al. “Identification of a Potent and Selective Noncovalent Cathepsin S Inhibitor”. In: *Journal of Pharmacology and Experimental Therapeutics* 308.1 (2004), pp. 268–276. ISSN: 0022-3565, 1521-0103. DOI: [10.1124/jpet.103.056879](https://doi.org/10.1124/jpet.103.056879). URL: <http://jpet.aspetjournals.org/lookup/doi/10.1124/jpet.103.056879>.
10. Michael K. Ameriks et al. “Diazinones as P2 replacements for pyrazole-based cathepsin S inhibitors”. In: *Bioorganic & Medicinal Chemistry Letters* 20.14 (2010), pp. 4060–4064. ISSN: 0960894X. DOI: [10.1016/j.bmcl.2010.05.086](https://doi.org/10.1016/j.bmcl.2010.05.086). URL: <https://linkinghub.elsevier.com/retrieve/pii/S0960894X10007274>.
11. Danielle K. Wiener et al. “Thioether acetamides as P3 binding elements for tetrahydropyrido-pyrazole cathepsin S inhibitors”. In: *Bioorganic & Medicinal Chemistry Letters* 20.7 (2010), pp. 2379–2382. ISSN: 0960894X. DOI: [10.1016/j.bmcl.2010.01.103](https://doi.org/10.1016/j.bmcl.2010.01.103). URL: <https://linkinghub.elsevier.com/retrieve/pii/S0960894X10001150>.
12. Michael K. Ameriks et al. “Pyrazole-based cathepsin S inhibitors with arylalkynes as P1 binding elements”. In: *Bioorganic & Medicinal Chemistry Letters* 19.21 (2009), pp. 6131–6134. ISSN: 0960894X. DOI: [10.1016/j.bmcl.2009.09.014](https://doi.org/10.1016/j.bmcl.2009.09.014). URL: <https://linkinghub.elsevier.com/retrieve/pii/S0960894X09012712>.
13. Rommie E. Amaro et al. “Discovery of drug-like inhibitors of an essential RNA-editing ligase in *Trypanosoma brucei*”. In: *Proceedings of the National Academy of Sciences of the United States of America* 105.45 (2008), pp. 17278–17283. ISSN: 0027-8424. DOI: [10.1073/pnas.0805820105](https://doi.org/10.1073/pnas.0805820105). URL: <https://www.ncbi.nlm.nih.gov/pmc/articles/PMC2577703/>.
14. Jin Li, Ailing Fu, and Le Zhang. “An Overview of Scoring Functions Used for Protein-Ligand Interactions in Molecular Docking”. In: *Interdisciplinary Sciences: Computational Life Sciences* 11.2 (2019), pp. 320–328. ISSN: 1913-2751, 1867-1462. DOI: [10.1007/s12539-019-00327-w](https://doi.org/10.1007/s12539-019-00327-w). URL: <http://link.springer.com/10.1007/s12539-019-00327-w>.

- 699 15. Sheng-You Huang, Sam Z. Grinter, and Xiaoqin Zou. 748  
700 “Scoring functions and their evaluation methods for pro- 749  
701 teinâligand docking: recent advances and future direc- 750  
702 tions”. In: *Physical Chemistry Chemical Physics* 12.40 751  
703 (2010), p. 12899. ISSN: 1463-9076, 1463-9084. DOI: 752  
704 [10.1039/c0cp00151a](https://doi.org/10.1039/c0cp00151a). URL: <http://xlink.rsc.org/?DOI=c0cp00151a>. 753
- 705  
706 16. M. Teodoro and L. Kavraki. “Conformational Flexibility 754  
707 Models for the Receptor in Structure Based Drug De- 755  
708 sign”. In: *Current Pharmaceutical Design* 9.20 (2003), 756  
709 pp. 1635–1648. ISSN: 13816128. DOI: [10.2174/13816120334545546](https://doi.org/10.2174/13816120334545546). ISSN: 0968-0004. DOI: [10.1016/j.tibs.2010.04.](https://doi.org/10.1016/j.tibs.2010.04.009) 757  
710 URL: [http://www.eurekaselect.com/openurl/](http://www.eurekaselect.com/openurl/content.php?genre=article&issn=1381-6128&volume=9&issue=20&spage=1635) 758  
711 [content.php?genre=article&issn=1381-6128&](http://www.eurekaselect.com/openurl/content.php?genre=article&issn=1381-6128&volume=9&issue=20&spage=1635) 759  
712 [volume=9&issue=20&spage=1635](http://www.eurekaselect.com/openurl/content.php?genre=article&issn=1381-6128&volume=9&issue=20&spage=1635). 760
- 713 17. Gregory Sliwoski et al. “Computational Methods in Drug 761  
714 Discovery”. In: *Pharmacological Reviews* 66.1 (2014), 762  
715 pp. 334–395. ISSN: 0031-6997. DOI: [10.1124/pr.112.](https://doi.org/10.1124/pr.112.007336) 763  
716 [007336](https://doi.org/10.1124/pr.112.007336). URL: [https://www.ncbi.nlm.nih.gov/](https://www.ncbi.nlm.nih.gov/pmc/articles/PMC3880464/) 764  
717 [pmc/articles/PMC3880464/](https://www.ncbi.nlm.nih.gov/pmc/articles/PMC3880464/). 765
- 718 18. Mark von Itzstein et al. “Rational design of potent 766  
719 sialidase-based inhibitors of influenza virus replication”. 767  
720 In: *Nature* 363.6428 (1993), pp. 418–423. ISSN: 0028- 768  
721 0836, 1476-4687. DOI: [10.1038/363418a0](https://doi.org/10.1038/363418a0). URL: <http://www.nature.com/articles/363418a0>. 769  
722 <http://www.nature.com/articles/363418a0>. 770
- 723 19. Maxim Totrov and Ruben Abagyan. “Flexible ligand 771  
724 docking to multiple receptor conformations: a prac- 772  
725 tical alternative”. In: *Current Opinion in Structural* 773  
726 *Biology* 18.2 (2008), pp. 178–184. ISSN: 0959440X. 774  
727 DOI: [10.1016/j.sbi.2008.01.004](https://doi.org/10.1016/j.sbi.2008.01.004). URL: [https://](https://linkinghub.elsevier.com/retrieve/pii/S0959440X08000080) 775  
728 [linkinghub.elsevier.com/retrieve/pii/](https://linkinghub.elsevier.com/retrieve/pii/S0959440X08000080) 776  
729 [S0959440X08000080](https://linkinghub.elsevier.com/retrieve/pii/S0959440X08000080). 777
- 730 20. Nataraj S. Pagadala, Khajamohiddin Syed, and Jack 778  
731 Tuszynski. “Software for molecular docking: a review”. 779  
732 In: *Biophysical Reviews* 9.2 (2017), pp. 91–102. ISSN: 780  
733 1867-2450. DOI: [10.1007/s12551-016-0247-1](https://doi.org/10.1007/s12551-016-0247-1). URL: 781  
734 [https://www.ncbi.nlm.nih.gov/pmc/articles/](https://www.ncbi.nlm.nih.gov/pmc/articles/PMC5425816/) 782  
735 [PMC5425816/](https://www.ncbi.nlm.nih.gov/pmc/articles/PMC5425816/). 783
- 736 21. R Elber and M Karplus. “Multiple conformational states 784  
737 of proteins: a molecular dynamics analysis of myoglobin”. 785  
738 In: *Science* 235.4786 (1987), pp. 318–321. ISSN: 0036- 786  
739 8075, 1095-9203. DOI: [10.1126/science.3798113](https://doi.org/10.1126/science.3798113). 787  
740 URL: [https://www.sciencemag.org/lookup/doi/](https://www.sciencemag.org/lookup/doi/10.1126/science.3798113) 788  
741 [10.1126/science.3798113](https://www.sciencemag.org/lookup/doi/10.1126/science.3798113). 789
- 742 22. Buyong Ma et al. “Folding funnels and binding mecha- 790  
743 nisms”. In: *Protein Engineering, Design and Selection* 791  
744 12.9 (1999), pp. 713–720. ISSN: 1741-0134, 1741-0126. 792  
745 DOI: [10.1093/protein/12.9.713](https://doi.org/10.1093/protein/12.9.713). URL: [https://](https://academic.oup.com/peds/article-lookup/doi/10.1093/protein/12.9.713) 793  
746 [academic.oup.com/peds/article-lookup/](https://academic.oup.com/peds/article-lookup/doi/10.1093/protein/12.9.713) 794  
747 [doi/10.1093/protein/12.9.713](https://academic.oup.com/peds/article-lookup/doi/10.1093/protein/12.9.713). 795  
796
- 748 23. Stefano Gianni, Jakob Dogan, and Per Jemth. “Distin- 749  
750 guishing induced fit from conformational selection”. 751  
752 In: *Biophysical Chemistry* 189 (2014), pp. 33–39. ISSN: 753  
03014622. DOI: [10.1016/j.bpc.2014.03.003](https://doi.org/10.1016/j.bpc.2014.03.003). URL: 754  
[https://linkinghub.elsevier.com/retrieve/](https://linkinghub.elsevier.com/retrieve/pii/S0301462214000428) 755  
[pii/S0301462214000428](https://linkinghub.elsevier.com/retrieve/pii/S0301462214000428). 756
- 757 24. Peter Csermely, Robin Palotai, and Ruth Nussinov. “In- 758  
759 duced fit, conformational selection and independent dy- 760  
761 namic segments: an extended view of binding events”. In: 762  
*Trends in biochemical sciences* 35.10 (2010), pp. 539– 763  
546. ISSN: 0968-0004. DOI: [10.1016/j.tibs.2010.04.](https://doi.org/10.1016/j.tibs.2010.04.009) 764  
009. URL: [https://www.ncbi.nlm.nih.gov/pmc/](https://www.ncbi.nlm.nih.gov/pmc/articles/PMC3018770/) 765  
[articles/PMC3018770/](https://www.ncbi.nlm.nih.gov/pmc/articles/PMC3018770/). 766
- 767 25. Rommie E. Amaro et al. “Ensemble Docking in Drug Dis- 768  
769 covery”. In: *Biophysical Journal* 114.10 (2018), pp. 2271– 770  
2278. ISSN: 1542-0086. DOI: [10.1016/j.bpj.2018.02.](https://doi.org/10.1016/j.bpj.2018.02.038) 771  
038. 772
- 773 26. Tavina L. Offutt, Robert V. Swift, and Rommie E. Amaro. 774  
775 “Enhancing Virtual Screening Performance of Protein 776  
777 Kinases with Molecular Dynamics Simulations”. In: 778  
*Journal of Chemical Information and Modeling* 56.10 779  
(2016), pp. 1923–1935. ISSN: 1549-9596, 1549-960X. 780  
DOI: [10.1021/acs.jcim.6b00261](https://doi.org/10.1021/acs.jcim.6b00261). URL: [https://](https://pubs.acs.org/doi/10.1021/acs.jcim.6b00261) 781  
[pubs.acs.org/doi/10.1021/acs.jcim.6b00261](https://pubs.acs.org/doi/10.1021/acs.jcim.6b00261). 782
- 783 27. Heather A. Carlson, Kevin M. Masukawa, and J. An- 784  
785 drew McCammon. “Method for Including the Dynamic 786  
787 Fluctuations of a Protein in Computer-Aided Drug De- 788  
789 sign”. In: *The Journal of Physical Chemistry A* 103.49 790  
(1999), pp. 10213–10219. ISSN: 1089-5639, 1520-5215. 791  
DOI: [10.1021/jp991997z](https://doi.org/10.1021/jp991997z). URL: [https://pubs.acs.](https://pubs.acs.org/doi/10.1021/jp991997z) 792  
[org/doi/10.1021/jp991997z](https://pubs.acs.org/doi/10.1021/jp991997z). 793
- 794 28. Heather A. Carlson et al. “Developing a Dynamic Phar- 795  
796 macophore Model for HIV-1 Integrase”. In: *Journal of* 797  
*Medicinal Chemistry* 43.11 (2000), pp. 2100–2114. ISSN: 798  
0022-2623, 1520-4804. DOI: [10.1021/jm990322h](https://doi.org/10.1021/jm990322h). URL: 799  
<https://pubs.acs.org/doi/10.1021/jm990322h>. 800
- 801 29. Jung-Hsin Lin et al. “Computational Drug Design Ac- 802  
803 commodating Receptor Flexibility: The Relaxed Com- 804  
805 plex Scheme”. In: *Journal of the American Chemical* 806  
*Society* 124.20 (2002), pp. 5632–5633. ISSN: 0002-7863, 807  
1520-5126. DOI: [10.1021/ja0260162](https://doi.org/10.1021/ja0260162). URL: [https://](https://pubs.acs.org/doi/10.1021/ja0260162) 808  
[pubs.acs.org/doi/10.1021/ja0260162](https://pubs.acs.org/doi/10.1021/ja0260162). 809
- 810 30. Rommie E. Amaro, Riccardo Baron, and J. Andrew 811  
812 McCammon. “An improved relaxed complex scheme 813  
814 for receptor flexibility in computer-aided drug design”. 815  
816 In: *Journal of Computer-Aided Molecular Design* 22.9 817  
(2008), pp. 693–705. ISSN: 0920-654X, 1573-4951. DOI: 818  
[10.1007/s10822-007-9159-2](https://doi.org/10.1007/s10822-007-9159-2). URL: [http://link.](http://link.springer.com/10.1007/s10822-007-9159-2) 819  
[springer.com/10.1007/s10822-007-9159-2](http://link.springer.com/10.1007/s10822-007-9159-2). 820

- 797 31. Sheng-You Huang and Xiaoqin Zou. “Ensemble docking  
798 of multiple protein structures: Considering protein struc-  
799 tural variations in molecular docking”. In: *Proteins: Struc-  
800 ture, Function, and Bioinformatics* 66.2 (2006), pp. 399–  
801 421. ISSN: 08873585. DOI: [10.1002/prot.21214](https://doi.org/10.1002/prot.21214). URL:  
802 <http://doi.wiley.com/10.1002/prot.21214>.
- 803 32. Lily S. Cheng et al. “Ensemble-based virtual screen-  
804 ing reveals potential novel antiviral compounds for avian  
805 influenza neuraminidase”. In: *Journal of Medicinal Chem-  
806 istry* 51.13 (2008), pp. 3878–3894. ISSN: 1520-4804. DOI:  
807 [10.1021/jm8001197](https://doi.org/10.1021/jm8001197).
- 808 33. Jacob D. Durrant et al. “Novel Naphthalene-Based In-  
809 hibitors of Trypanosoma brucei RNA Editing Ligase 1”.  
810 In: *PLoS Neglected Tropical Diseases* 4.8 (2010). ISSN:  
811 1935-2727. DOI: [10.1371/journal.pntd.0000803](https://doi.org/10.1371/journal.pntd.0000803).  
812 URL: [https://www.ncbi.nlm.nih.gov/pmc/  
813 articles/PMC2927429/](https://www.ncbi.nlm.nih.gov/pmc/articles/PMC2927429/).
- 814 34. Christopher D. Wassman et al. “Computational identifi-  
815 cation of a transiently open L1/S3 pocket for reactivation  
816 of mutant p53”. In: *Nature Communications* 4 (2013),  
817 p. 1407. ISSN: 2041-1723. DOI: [10.1038/ncomms2361](https://doi.org/10.1038/ncomms2361).  
818 URL: [https://www.ncbi.nlm.nih.gov/pmc/  
819 articles/PMC3562459/](https://www.ncbi.nlm.nih.gov/pmc/articles/PMC3562459/).
- 820 35. Anthony Ivetic et al. “Discovery of Novel Inhibitors of  
821 HIV-1 Reverse Transcriptase Through Virtual Screening  
822 of Experimental and Theoretical Ensembles”. In: *Chem-  
823 ical biology & drug design* 83.5 (2014), pp. 521–531.  
824 ISSN: 1747-0277. DOI: [10.1111/cbdd.12277](https://doi.org/10.1111/cbdd.12277). URL:  
825 [https://www.ncbi.nlm.nih.gov/pmc/articles/  
826 PMC3999242/](https://www.ncbi.nlm.nih.gov/pmc/articles/PMC3999242/).
- 827 36. J. M. Barnard and G. M. Downs. “Clustering of chemical  
828 structures on the basis of two-dimensional similarity  
829 measures”. In: *J. Chem. Inf. Model.* 32.6 (1992), pp. 644–  
830 649. ISSN: 1549-9596. DOI: [10.1021/ci00010a010](https://doi.org/10.1021/ci00010a010).  
831 URL: [https://pubs.acs.org/doi/abs/10.1021/  
832 ci00010a010](https://pubs.acs.org/doi/abs/10.1021/ci00010a010).
- 833 37. Jianyin Shao et al. “Clustering Molecular Dynamics Tra-  
834 jectories: 1. Characterizing the Performance of Different  
835 Clustering Algorithms”. In: *Journal of Chemical The-  
836 ory and Computation* 3.6 (2007), pp. 2312–2334. ISSN:  
837 1549-9618, 1549-9626. DOI: [10.1021/ct700119m](https://doi.org/10.1021/ct700119m). URL:  
838 <https://pubs.acs.org/doi/10.1021/ct700119m>.
- 839 38. Xiaohu Hu et al. “The dynamics of single protein molecules  
840 is non-equilibrium and self-similar over thirteen decades  
841 in time”. In: *Nature Physics* 12.2 (2016), pp. 171–174.  
842 ISSN: 1745-2481. DOI: [10.1038/nphys3553](https://doi.org/10.1038/nphys3553). URL: [https:  
843 //www.nature.com/articles/nphys3553](https://www.nature.com/articles/nphys3553).
- 844 39. Edward Lyman and Daniel M. Zuckerman. “Ensemble-  
845 Based Convergence Analysis of Biomolecular Trajec-  
846 tories”. In: *Biophysical Journal* 91.1 (2006), pp. 164–  
847 172. ISSN: 0006-3495. DOI: [10.1529/biophysj.106.  
848 082941](https://doi.org/10.1529/biophysj.106.082941). URL: [https://www.ncbi.nlm.nih.gov/  
849 pmc/articles/PMC1479051/](https://www.ncbi.nlm.nih.gov/pmc/articles/PMC1479051/).
- 850 40. Wilfredo Evangelista Falcon et al. “Ensemble Docking  
851 in Drug Discovery: How Many Protein Configurations  
852 from Molecular Dynamics Simulations are Needed To  
853 Reproduce Known Ligand Binding?” In: *The Journal  
854 of Physical Chemistry B* 123.25 (2019), pp. 5189–5195.  
855 ISSN: 1520-6106, 1520-5207. DOI: [10.1021/acs.jpcc.  
856 8b11491](https://doi.org/10.1021/acs.jpcc.8b11491). URL: [https://pubs.acs.org/doi/10.  
857 1021/acs.jpcc.8b11491](https://pubs.acs.org/doi/10.1021/acs.jpcc.8b11491).
- 858 41. Martin K. Scherer et al. “PyEMMA 2: A Software Pack-  
859 age for Estimation, Validation, and Analysis of Markov  
860 Models”. In: *J. Chem. Theory Comput.* 11.11 (2015),  
861 pp. 5525–5542. ISSN: 1549-9618, 1549-9626. DOI: [10.  
862 1021/acs.jctc.5b00743](https://doi.org/10.1021/acs.jctc.5b00743). URL: [https://pubs.acs.  
863 org/doi/10.1021/acs.jctc.5b00743](https://pubs.acs.org/doi/10.1021/acs.jctc.5b00743).
- 864 42. J. A. Hartigan and M. A. Wong. “Algorithm AS 136: A K-  
865 Means Clustering Algorithm”. In: *Applied Statistics* 28.1  
866 (1979), p. 100. ISSN: 00359254. DOI: [10.2307/2346830](https://doi.org/10.2307/2346830).  
867 URL: [https://www.jstor.org/stable/10.2307/  
868 2346830?origin=crossref](https://www.jstor.org/stable/10.2307/2346830?origin=crossref).
- 869 43. Xavier Daura et al. “Peptide Folding: When Simulation  
870 Meets Experiment”. In: (), p. 5.
- 871 44. Guillermo Perez-Hernandez et al. “Identification of slow  
872 molecular order parameters for Markov model construc-  
873 tion”. In: *The Journal of Chemical Physics* 139.1 (2013),  
874 p. 015102. ISSN: 0021-9606, 1089-7690. DOI: [10.1063/  
875 1.4811489](https://doi.org/10.1063/1.4811489). URL: [http://aip.scitation.org/doi/  
876 10.1063/1.4811489](http://aip.scitation.org/doi/10.1063/1.4811489).
- 877 45. Charles C. David and Donald J. Jacobs. “Principal com-  
878 ponent analysis: a method for determining the essential  
879 dynamics of proteins”. In: *Methods in Molecular Biology  
880 (Clifton, N.J.)* 1084 (2014), pp. 193–226. ISSN: 1940-6029.  
881 DOI: [10.1007/978-1-62703-658-  
882 0\\_11](https://doi.org/10.1007/978-1-62703-658-0_11).
- 883 46. Mark McGann. “FRED Pose Prediction and Virtual  
884 Screening Accuracy”. In: *Journal of Chemical Infor-  
885 mation and Modeling* 51.3 (2011), pp. 578–596. ISSN:  
886 1549-9596, 1549-960X. DOI: [10.1021/ci100436p](https://doi.org/10.1021/ci100436p). URL:  
887 <https://pubs.acs.org/doi/10.1021/ci100436p>.
- 888 47. Richard A. Friesner et al. “Glide: A New Approach  
889 for Rapid, Accurate Docking and Scoring. 1. Method  
890 and Assessment of Docking Accuracy”. In: *Journal of  
891 Medicinal Chemistry* 47.7 (2004), pp. 1739–1749. ISSN:  
892 0022-2623, 1520-4804. DOI: [10.1021/jm0306430](https://doi.org/10.1021/jm0306430). URL:  
893 <https://pubs.acs.org/doi/10.1021/jm0306430>.
- 894 48. Cynthia Gray et al. “Known Structure, Unknown Function:  
895 An Inquiry-Based Undergraduate Biochemistry Labora-  
896 tory Course: Known Structure, Unknown Function: A  
897 New Biochemistry Lab”. en. In: *Biochemistry and Molec-  
898 ular Biology Education* 43.4 (2015), pp. 245–262. ISSN:  
14708175. DOI: [10.1002/bmb.20873](https://doi.org/10.1002/bmb.20873).

- 899 49. Jennifer M. Heemstra et al. “Throwing Away the Cook- 947  
900 book: Implementing Course-Based Undergraduate Re- 948  
901 search Experiences (CUREs) in Chemistry”. In: *Educa- 949  
902 tional and Outreach Projects from the Cottrell Scholars 950  
903 Collaborative Undergraduate and Graduate Education 951  
904 Volume 1*. Vol. 1248. ACS Symposium Series. American 952  
905 Chemical Society, 2017. Chap. 3, pp. 33–63. ISBN: 978- 953  
906 0-8412-3208-2. DOI: [10.1021/bk-2017-1248.ch003](https://doi.org/10.1021/bk-2017-1248.ch003).
- 907 50. Helen M. Berman et al. “The Protein Data Bank”. In: 955  
908 *Nucleic Acids Research* 28.1 (2000), pp. 235–242. ISSN: 956  
909 0305-1048. DOI: [10.1093/nar/28.1.235](https://doi.org/10.1093/nar/28.1.235). URL: [https://academic.oup.com/nar/article/28/1/235/ 957  
910 2384399](https://academic.oup.com/nar/article/28/1/235/2384399). 958
- 911 51. *Maestro*. New York, NY, 2019. 959
- 912 52. G. Madhavi Sastry et al. “Protein and ligand preparation: 960  
913 parameters, protocols, and influence on virtual screening 961  
914 enrichments”. In: *Journal of Computer-Aided Molecular 962  
915 Design* 27.3 (2013), pp. 221–234. ISSN: 0920-654X, 1573- 963  
916 4951. DOI: [10.1007/s10822-013-9644-8](https://doi.org/10.1007/s10822-013-9644-8). URL: [http://link.springer.com/10.1007/s10822-013- 964  
917 9644-8](http://link.springer.com/10.1007/s10822-013-9644-8). 965
- 920 53. Junmei Wang et al. “Development and testing of a general 966  
921 amber force field”. In: *J. Comput. Chem.* 25.9 (2004), 967  
922 pp. 1157–1174. ISSN: 0192-8651, 1096-987X. DOI: [10.1002/jcc.20035](https://doi.org/10.1002/jcc.20035). URL: [http://doi.wiley.com/10. 968  
923 1002/jcc.20035](http://doi.wiley.com/10.1002/jcc.20035). 969
- 924 54. Christopher I. Bayly et al. “A Well-Behaved Electrostatic 970  
925 Potential Based Method Using Charge Restraints for 971  
926 Deriving Atomic Charges: The RESP Model”. In: *The 972  
927 Journal of Physical Chemistry* 97.40 (1993), pp. 10269– 973  
928 10280. ISSN: 0022-3654. DOI: [10.1021/j100142a004](https://doi.org/10.1021/j100142a004). 974
- 930 55. Araz Jakalian et al. “Fast, Efficient Generation of High- 975  
931 Quality Atomic Charges. AM1-BCC Model: I. Method”. 976  
932 en. In: *Journal of Computational Chemistry* 21.2 (2000), 977  
933 pp. 132–146. ISSN: 1096-987X. DOI: [10.1002/\(SICI\) 978  
934 1096-987X\(20000130\)21:2<132::AID-JCC5>3.0. 979  
935 CO;2-P](https://doi.org/10.1002/(SICI)1096-987X(20000130)21:2<132::AID-JCC5>3.0.CO;2-P). 980
- 936 56. Araz Jakalian, David B. Jack, and Christopher I. Bayly. 981  
937 “Fast, Efficient Generation of High-Quality Atomic Charges. 982  
938 AM1-BCC Model: II. Parameterization and Validation”. 983  
939 eng. In: *Journal of Computational Chemistry* 23.16 (2002), 984  
940 pp. 1623–1641. ISSN: 0192-8651. DOI: [10.1002/ 985  
941 jcc.10128](https://doi.org/10.1002/jcc.10128). 986
- 942 57. Chresten R. Søndergaard et al. “Improved Treatment of 987  
943 Ligands and Coupling Effects in Empirical Calculation 988  
944 and Rationalization of pKa Values”. In: *Journal of Chem- 989  
945 ical Theory and Computation* 7.7 (2011), pp. 2284–2295. 990  
946 ISSN: 1549-9618. DOI: [10.1021/ct200133y](https://doi.org/10.1021/ct200133y). 991
- 947 58. Mats H. M. Olsson et al. “PROPKA3: Consistent Treat- 992  
948 ment of Internal and Surface Residues in Empirical pKa 993  
949 Predictions”. In: *Journal of Chemical Theory and Com- 994  
950 putation* 7.2 (2011), pp. 525–537. ISSN: 1549-9618. DOI: 995  
951 [10.1021/ct100578z](https://doi.org/10.1021/ct100578z).
- 952 59. D.A. Case, I.Y. Ben-Shalom, S.R. Brozell, D.S. Cerutti, 996  
953 T.E. Cheatham, III, V.W.D. Cruzeiro, T.A. Darden, R.E. 997  
954 Duke, D. Ghoreishi, M.K. Gilson, H. Gohlke, A.W. Goetz, 998  
955 D. Greene, R Harris, N. Homeyer, Y. Huang, S. Izadi, 999  
956 A. Kovalenko, T. Kurtzman, T.S. Lee, S. LeGrand, P. 1000  
957 Li, C. Lin, J. Liu, T. Luchko, R. Luo, D.J. Mermelstein, 1001  
958 K.M. Merz, Y. Miao, G. Monard, C. Nguyen, H. Nguyen, 1002  
959 I. Omelyan, A. Onufriev, F. Pan, R. Qi, D.R. Roe, A. 1003  
960 Roitberg, C. Sagui, S. Schott-Verdugo, J. Shen, C.L. 1004  
961 Simmerling, J. Smith, R. SalomonFerrer, J. Swails, R.C. 1005  
962 Walker, J. Wang, H. Wei, R.M. Wolf, X. Wu, L. Xiao, 1006  
963 D.M. York and P.A. Kollman. *AMBER 2018*. University 1007  
964 of California, San Francisco, 2018.
- 965 60. Jeremy D. Schmit et al. “SLTCAP: A Simple Method for 1008  
966 Calculating the Number of Ions Needed for MD Simula- 1009  
967 tion”. In: *Journal of Chemical Theory and Computation* 14.4 (2018), pp. 1823–1827. ISSN: 1549-9618, 1549-9626. DOI: [10.1021/acs.jctc.7b01254](https://doi.org/10.1021/acs.jctc.7b01254). URL: [https:// 1010  
968 pubs.acs.org/doi/10.1021/acs.jctc.7b01254](https://pubs.acs.org/doi/10.1021/acs.jctc.7b01254). 1011
- 971 61. Chad W. Hopkins et al. “Long-Time-Step Molecular 1012  
972 Dynamics through Hydrogen Mass Repartitioning”. In: 1013  
973 *Journal of Chemical Theory and Computation* 11.4 1014  
974 (2015). Publisher: American Chemical Society, pp. 1864– 1015  
975 1874. ISSN: 1549-9618. DOI: [10.1021/ct5010406](https://doi.org/10.1021/ct5010406). URL: 1016  
976 <https://doi.org/10.1021/ct5010406>. 1017
- 977 62. Jean-Paul Ryckaert, Giovanni Ciccotti, and Herman J. C 1018  
978 Berendsen. “Numerical Integration of the Cartesian Equa- 1019  
979 tions of Motion of a System with Constraints: Molecular 1020  
980 Dynamics of n-Alkanes”. en. In: *Journal of Computa- 1021  
981 tional Physics* 23.3 (1977), pp. 327–341. ISSN: 0021-9991. 1022  
982 DOI: [10.1016/0021-9991\(77\)90098-5](https://doi.org/10.1016/0021-9991(77)90098-5). 1023
- 983 63. Aapo Hyvarinen, Juha Karhunen, and Erkki Oja. *Inde- 1024  
984 pendent component analysis*. New York: J. Wiley, 2001. 1025  
985 481 pp. ISBN: 978-0-471-40540-5.
- 986 64. L. Molgedey and H. G. Schuster. “Separation of a mixture 1026  
987 of independent signals using time delayed correlations”. 1027  
988 In: *Phys. Rev. Lett.* 72.23 (1994), pp. 3634–3637. ISSN: 1028  
989 0031-9007. DOI: [10.1103/PhysRevLett.72.3634](https://doi.org/10.1103/PhysRevLett.72.3634). 1029  
990 URL: [https://link.aps.org/doi/10.1103/ 1030  
991 PhysRevLett.72.3634](https://link.aps.org/doi/10.1103/PhysRevLett.72.3634). 1031
- 992 65. Hao Wu and Frank NoÃl. “Variational Approach for 1032  
993 Learning Markov Processes from Time Series Data”. In: 1033  
994 *J Nonlinear Sci* 30.1 (2020), pp. 23–66. ISSN: 0938-8974, 1034  
995 1432-1467. DOI: [10.1007/s00332-019-09567-y](https://doi.org/10.1007/s00332-019-09567-y). 1035

- 996 66. Renata De Paris et al. “Clustering Molecular Dynam- 1045  
997 ics Trajectories for Optimizing Docking Experiments”. 1046  
998 In: *Computational Intelligence and Neuroscience* 2015 1047  
999 (2015). ISSN: 1687-5265. DOI: [10.1155/2015/916240](https://doi.org/10.1155/2015/916240). 1048  
1000 URL: [https://www.ncbi.nlm.nih.gov/pmc/](https://www.ncbi.nlm.nih.gov/pmc/articles/PMC4385651/) 1049  
1001 [articles/PMC4385651/](https://www.ncbi.nlm.nih.gov/pmc/articles/PMC4385651/). 1050
- 1002 67. Travis E Oliphant. *Guide to NumPy*. Austin, Tex.: Con- 1051  
1003 tinuum Press, 2015. ISBN: 978-1-5173-0007-4. 1052
- 1004 68. Robert T. McGibbon et al. “MDTraj: A Modern Open 1053  
1005 Library for the Analysis of Molecular Dynamics Trajec- 1054  
1006 tories”. In: *Biophysical Journal* 109.8 (2015), pp. 1528– 1055  
1007 1532. ISSN: 00063495. DOI: [10.1016/j.bpj.2015.](https://doi.org/10.1016/j.bpj.2015.08.015) 1056  
1008 [08.015](https://doi.org/10.1016/j.bpj.2015.08.015). URL: [https://linkinghub.elsevier.com/](https://linkinghub.elsevier.com/retrieve/pii/S0006349515008267) 1057  
1009 [retrieve/pii/S0006349515008267](https://linkinghub.elsevier.com/retrieve/pii/S0006349515008267). 1058
- 1010 69. John D. Hunter. “Matplotlib: A 2D Graphics Environ- 1059  
1011 ment”. In: *Computing in Science & Engineering* 9.3 1060  
1012 (2007), pp. 90–95. ISSN: 1521-9615. DOI: [10.1109/](https://doi.org/10.1109/MCSE.2007.55) 1061  
1013 [MCSE.2007.55](https://doi.org/10.1109/MCSE.2007.55). URL: [http://ieeexplore.ieee.](http://ieeexplore.ieee.org/document/4160265/) 1062  
1014 [org/document/4160265/](http://ieeexplore.ieee.org/document/4160265/). 1063
- 1015 70. Schrödinger, LLC. “The PyMOL Molecular Graphics 1064  
1016 System, Version 1.8”. 2015. 1065
- 1017 71. Thomas A. Halgren et al. “Glide: A New Approach for 1066  
1018 Rapid, Accurate Docking and Scoring. 2. Enrichment 1067  
1019 Factors in Database Screening”. In: *Journal of Medicinal* 1068  
1020 *Chemistry* 47.7 (2004), pp. 1750–1759. ISSN: 0022-2623, 1069  
1021 1520-4804. DOI: [10.1021/jm030644s](https://doi.org/10.1021/jm030644s). URL: <https://pubs.acs.org/doi/10.1021/jm030644s>. 1070  
1022 <https://pubs.acs.org/doi/10.1021/jm030644s>. 1071
- 1023 72. B. et al Harrington. *Inkscape*. 2004. URL: [http://www.](http://www.inkscape.org/) 1072  
1024 [inkscape.org/](http://www.inkscape.org/). 1073
- 1025 73. Paul C. D. Hawkins et al. “Conformer Generation with 1074  
1026 OMEGA: Algorithm and Validation Using High Quality 1075  
1027 Structures from the Protein Databank and Cambridge 1076  
1028 Structural Database”. In: *Journal of Chemical Informa- 1077  
1029 tion and Modeling* 50.4 (2010), pp. 572–584. ISSN: 1078  
1030 1549-9596, 1549-960X. DOI: [10.1021/ci100031x](https://doi.org/10.1021/ci100031x). URL: 1079  
1031 <https://pubs.acs.org/doi/10.1021/ci100031x>. 1080
- 1032 74. Mark McGann. “FRED and HYBRID docking perfor- 1081  
1033 mance on standardized datasets”. In: *Journal of Computer-* 1082  
1034 *Aided Molecular Design* 26.8 (2012), pp. 897–906. ISSN: 1083  
1035 0920-654X, 1573-4951. DOI: [10.1007/s10822-012-](https://doi.org/10.1007/s10822-012-9584-8) 1084  
1036 [9584-8](https://doi.org/10.1007/s10822-012-9584-8). URL: [http://link.springer.com/10.](http://link.springer.com/10.1007/s10822-012-9584-8) 1085  
1037 [1007/s10822-012-9584-8](http://link.springer.com/10.1007/s10822-012-9584-8). 1086
- 1038 75. *LigPrep*. New York, NY, 2019. 1087
- 1039 76. Richard A. Friesner et al. “Extra Precision Glide: Dock- 1088  
1040 ing and Scoring Incorporating a Model of Hydrophobic 1089  
1041 Enclosure for Protein-Ligand Complexes”. In: *Journal of* 1090  
1042 *Medicinal Chemistry* 49.21 (2006), pp. 6177–6196. ISSN: 1091  
1043 0022-2623, 1520-4804. DOI: [10.1021/jm051256o](https://doi.org/10.1021/jm051256o). URL: 1092  
1044 <https://pubs.acs.org/doi/10.1021/jm051256o>. 1093
- 1045 77. Bing Xie, John D. Clark, and David D. L. Minh. “Effi- 1046  
1047 ciency of Stratification for Ensemble Docking Using Re- 1048  
1049 duced Ensembles”. In: *Journal of Chemical Information* 1049  
1050 *and Modeling* 58.9 (2018), pp. 1915–1925. ISSN: 1549- 1051  
1052 9596, 1549-960X. DOI: [10.1021/acs.jcim.8b00314](https://doi.org/10.1021/acs.jcim.8b00314). 1053  
1054 URL: [https://pubs.acs.org/doi/10.1021/acs.](https://pubs.acs.org/doi/10.1021/acs.jcim.8b00314) 1055  
1056 [jcim.8b00314](https://pubs.acs.org/doi/10.1021/acs.jcim.8b00314). 1057
- 1058 78. SciPy 1.0 Contributors et al. “SciPy 1.0: fundamental 1059  
1059 algorithms for scientific computing in Python”. In: *Nat* 1060  
1061 *Methods* 17.3 (2020), pp. 261–272. ISSN: 1548-7091, 1062  
1063 1548-7105. DOI: [10.1038/s41592-019-0686-2](https://doi.org/10.1038/s41592-019-0686-2). URL: 1064  
1065 [http://www.nature.com/articles/s41592-019-](http://www.nature.com/articles/s41592-019-0686-2) 1066  
1067 [0686-2](http://www.nature.com/articles/s41592-019-0686-2). 1068
- 1069 79. Humphrey, W., Dalke, A. and Schulten, K. “VMD - Visual 1069  
1070 Molecular Dynamics”. In: 14 (1996), pp. 33–38. URL: 1071  
1072 <http://www.ks.uiuc.edu/Research/vmd/>. 1073
- 1074 80. John Stone. “An Efficient Library for Parallel Ray Tracing 1074  
1075 and Animation”. MA thesis. Computer Science Depart- 1075  
1076 ment, University of Missouri-Rolla, 1998. 1076
- 1077 81. Zhiyong Zhou et al. “Comparative Performance of Sev- 1077  
1078 eral Flexible Docking Programs and Scoring Functions: 1078  
1079 Enrichment Studies for a Diverse Set of Pharmaceuti- 1079  
1080 cally Relevant Targets”. In: *Journal of Chemical Informa- 1080  
1081 tion and Modeling* 47.4 (2007), pp. 1599–1608. ISSN: 1081  
1082 1549-9596, 1549-960X. DOI: [10.1021/ci7000346](https://doi.org/10.1021/ci7000346). URL: 1083  
1084 <https://pubs.acs.org/doi/10.1021/ci7000346>. 1084
- 1085 82. Ward, Y.D., Emmanuel, M.J., Thomson, D.S., Liu, W., 1085  
1086 Bekkali, Y., Frye, L.L., Girardot, M., Morwick, T., Young, 1086  
1087 E.R.R., Zindell, R., Hrapchak, M., DeTuri, M., White, 1087  
1088 A., Crane, K.M., White, D.M., Wang, Y., Hao, M.-H., 1088  
1089 Grygon, C.A., Labadia, M.E., Wildeson, J., Freeman, D., 1089  
1090 Nelson, R., Capolino, A., Peterson, J.D., Raymond, E.L., 1090  
1091 Brown, M.L., Spero, D.M. *Cathepsin S complexed with* 1091  
1092 *Compound 26*. 2007. DOI: [http://doi.org/10.2210/](http://doi.org/10.2210/pdb2R9N/pdb) 1092  
1093 [pdb2R9N/pdb](http://doi.org/10.2210/pdb2R9N/pdb). 1093
- 1094 83. Eddy Elisée et al. “Performance evaluation of molec- 1094  
1095 ular docking and free energy calculations protocols 1095  
1096 using the D3R Grand Challenge 4 dataset”. In: *Journal* 1096  
1097 *of Computer-Aided Molecular Design* 33.12 (2019), 1097  
1098 pp. 1031–1043. ISSN: 0920-654X, 1573-4951. DOI: [10.1007/s10822-019-](https://doi.org/10.1007/s10822-019-00232-w) 1098  
1099 [00232-w](https://doi.org/10.1007/s10822-019-00232-w). URL: [http://link.](http://link.springer.com/10.1007/s10822-019-00232-w) 1099  
1100 [springer.com/10.1007/s10822-019-00232-w](http://link.springer.com/10.1007/s10822-019-00232-w). 1100
- 1101 84. Zeynep Kurkcuoglu et al. “Performance of HADDOCK 1101  
1102 and a simple contact-based proteinligand binding affini- 1102  
1103 ty predictor in the D3R Grand Challenge 2”. In: *Journal* 1103  
1104 *of Computer-Aided Molecular Design* 32.1 (2018), 1104  
1105 pp. 175–185. ISSN: 0920-654X, 1573-4951. DOI: [10.1007/s10822-017-](https://doi.org/10.1007/s10822-017-0049-y) 1105  
1106 [0049-y](https://doi.org/10.1007/s10822-017-0049-y). URL: [http://link.](http://link.springer.com/10.1007/s10822-017-0049-y) 1106  
1107 [springer.com/10.1007/s10822-017-0049-y](http://link.springer.com/10.1007/s10822-017-0049-y). 1107

- 1094 85. Susan L. McGovern and Brian K. Shoichet. “Information  
1095 Decay in Molecular Docking Screens against Holo, Apo,  
1096 and Modeled Conformations of Enzymes”. In: *Journal of*  
1097 *Medicinal Chemistry* 46.14 (2003), pp. 2895–2907. ISSN:  
1098 0022-2623, 1520-4804. DOI: [10.1021/jm0300330](https://doi.org/10.1021/jm0300330). URL:  
1099 <https://pubs.acs.org/doi/10.1021/jm0300330>.
- 1100 86. Gerhard Klebe. “Virtual ligand screening: strategies,  
1101 perspectives and limitations”. In: *Drug Discovery Today*  
1102 11.13 (2006), pp. 580–594. ISSN: 1359-6446. DOI: [10.1016/j.drudis.2006.05.012](https://doi.org/10.1016/j.drudis.2006.05.012). URL: [https://www.  
1103 ncbi.nlm.nih.gov/pmc/articles/PMC7108249/](https://www.ncbi.nlm.nih.gov/pmc/articles/PMC7108249/).
- 1104  
1105 87. Yuwei Yang et al. “Exploring fragment-based target-  
1106 specific ranking protocol with machine learning on cathep-  
1107 sin S”. In: *Journal of Computer-Aided Molecular Design*  
1108 33.12 (2019), pp. 1095–1105. ISSN: 0920-654X, 1573-  
1109 4951. DOI: [10.1007/s10822-019-00247-3](https://doi.org/10.1007/s10822-019-00247-3). URL:  
1110 [http://link.springer.com/10.1007/s10822-  
1111 019-00247-3](http://link.springer.com/10.1007/s10822-019-00247-3).
